1 **SHORT TITLE**

2 Genome assembly and annotation of Peepal tree

3

4 **ARTICLE TITLE**

5 **Genome Sequencing Unravelling C3, C4 and CAM Photosynthetic Pathways**  
6 **in *Ficus religiosa***

7 KL Ashalatha<sup>1</sup>, KP Arunkumar<sup>2</sup>, Malali Gowda<sup>1,3</sup>

8

9 **CORRESPONDING AUTHOR**

10 Malali Gowda

11 The University of Trans-Disciplinary Health Sciences and Technology

12 Bengaluru - 560064

13 Email: malali.gene@gmail.com

14 <sup>1</sup> The University of Trans-Disciplinary Health Sciences and Technology, Bengaluru - 560064,

15 India

16 <sup>2</sup> Central Muga Eri Research and Training Institute (CMER&TI), Central Silk Board, Ministry  
17 of Textiles Lahdoigarh, Jorhat, Assam, India - 785700

18 <sup>3</sup> DNA Life Organization, Yelahanka, Bengaluru - 560064, India

19

20 **ONE SENTENCE SUMMARY**

21 Genome and transcriptome analyses revealed switches the between the Calvin-Benson (C3)  
22 cycle, C4-Dicarboxylic cycle and Crassulacean acid metabolism (CAM) cycle for carbon  
23 fixation in the Peepal tree (*Ficus religiosa*) during the day and night periods.

24

25 **AUTHOR CONTRIBUTIONS**

26 AKL performed the DNA and RNA isolation from leaf tissues, genome assembly and  
27 functional annotation, gene prediction, repeat prediction, orthologous gene clustering,  
28 Genome and Transcriptome pathway analysis, submitted WGS and RNA-seq data to  
29 NCBI, prepared the genomic and transcriptomic study tables and figures, wrote the  
30 manuscript; MG, AKL and AKP designed the genomic and transcriptomic experiments  
31 of *Ficus religiosa*; MG conceived and conceptualized the project; reviewed and edited  
32 the manuscript.

33

#### 34 **Abstract**

35 Peepal / Bodhi tree (*Ficus religiosa* L.) is an important long-lived keystone ecological species.  
36 This plant has been widely used by communities in Indian subcontinent in traditional medicine,  
37 Ayurveda and spirituality. Our study aimed to generate molecular resources from whole-  
38 genome and transcriptome sequencing approaches. The whole genome of Peepal tree was  
39 sequenced using Illumina and MGISEQ-2000 sequencers. We assembled the draft genome  
40 (380-Mb) of Peepal tree and annotated 35,093 protein-coding genes; 53% of its genome  
41 consists of repetitive sequences. To understand the photosynthetic pathways in leaf tissues, we  
42 analysed photosynthetically distinct conditions: bright sunny days and dark nights. The RNA-  
43 seq analysis supported the expression of 26,691 genes. The gene expression analysis of the day  
44 and night period revealed the molecular switches between the Calvin-Benson (C3) cycle, C4-  
45 Dicarboxylic cycle and Crassulacean acid metabolism (CAM) cycle for carbon fixation in  
46 leaves of Peepal tree.

47

48 **Keywords:** *Ficus religiosa*, genome sequencing, transcriptome sequencing, Carbon fixation  
49 pathway genes

50

## 51 **Introduction**

52 India's plant biodiversity is vast, rich, diverse and associated with profound science, culture  
53 and tradition. Peepal tree (*Ficus religiosa* L.), a sacred fig that belongs to Moraceae family,  
54 is a long-lived deciduous species related to 755 fig species widespread worldwide (Van Noort  
55 et al., 2007). Peepal tree is cosmopolitan species that is a culturally and spiritually sacred plant  
56 in Buddhism, Hinduism and Jainism. This plant is popularly known as the Bodhi tree, where  
57 Buddha is believed to have undergone spiritual enlightenment underneath this tree. Hence, the  
58 culture is spread across Asia and it has been worshipped as Bodhi and Ashwatha. Generally,  
59 Peepal tree has a special significance in communities across India that are believed to produce  
60 oxygen day and night. Although the special type of stoma is called *sunken, giant or hydathode*  
61 at the lower leaf epidermis of *F. religiosa*. These are larger than the normal stomata and occur  
62 over the veins or are mixed with normal stomata, it indicates that such stomata hold gaseous  
63 and water molecules for a longer time (Chantarasuwan et al., 2014). According to our  
64 knowledge, there are no scientific evidence to claim oxygen production during a dark period.

65 In Ayurveda, Peepal tree has been classified as a Rasayana (a type of drug), whereby  
66 rejuvenators and antioxidants aid in reliving the body's stress (Singh et al., 2011). Peepal tree  
67 alleviates Pitta and Kapha (Ayurvedic classifications), hence prescribed as an Ayurvedic  
68 treatment for the disorders like respiratory and inflammatory disorders, ulcers, stomatitis,  
69 hiccup, arthritis, gout, skin diseases, allergies, bone fracture, diabetes etc., (Singh et al., 2011).  
70 Peepal tree has been tested for the treatment of neurodegenerative disorders like Parkinson's  
71 disease and Huntington's disease in animal models like rats (Bhangale and Acharya, 2016) and  
72 (Bhangale et al., 2016).

73 Next-generation sequencing (NGS) technologies have accelerated the generation of draft  
74 genomes of Moraceae plant species including mulberry (*Morus notabilis*) (He et al., 2013)

75 and fig (*Ficus carica*) (Usai et al., 2020). The whole-genome and transcriptome sequencing of  
76 non-model plant species revealed the Crassulacean acid metabolism pathway in pineapple  
77 (*Ananas comosus*) (Ming et al., 2015a) and *Kalanchoë* (Yang et al., 2017). The whole-genome  
78 sequencing of common or crystalline ice plant (*Mesembryanthemum crystallinum*) has shown  
79 to switch from Calvin- Benson Cycle (C<sub>3</sub>) to CAM photosynthesis under salt stress (Guan et  
80 al., 2020). Using RNA-seq, the study described by comparing both species with and without  
81 the C<sub>4</sub> trait and different tissues within a C<sub>4</sub> plant suggests the ways of integration into the  
82 underlying C<sub>3</sub> metabolism (Schlüter et al., 2016).

83

84 In spite of its medicinal, cultural and historic importance, the molecular biology and genomics  
85 studies on the Peepal tree are scanty. Hence, the present study was hypothesized to elucidate  
86 the genome of the Peepal tree for future scientific studies. The objective of the present study  
87 was to generate a genome sequence for the Peepal tree and annotate genes. To understand the  
88 photosynthetic activity of the Peepal tree by identifying genes involved in various  
89 physiological, biochemical and other pathways.

90

## 91 **Results**

### 92 ***De novo* hybrid assembly using Illumina and MGI short reads**

93 We used two next-generation technology platforms to sequence the whole genome of the fig  
94 species, Peepal tree. Paired-end reads from Illumina HiSeq1000 and MGISEQ-2000 were 132  
95 and 322 million respectively; a total data of 88.44 billion high-quality bases (Quality>20) used  
96 for data assembly. A hybrid assembly was performed using 48.92X of Illumina reads and  
97 118.34X MGI reads. The raw data details are given (Supplemental Table S1). The hybrid  
98 assembly analysis resulted in a 380-Mb genome. The contig N50 length is 6,385 bp and the  
99 largest contig length is 174Kb. The GC content of the Peepal tree genome is 33.70%. The gap-

100 closing step was performed for the hybrid assembly. There were 35,811 (5.5%) misassembled  
101 contigs and 6,04,807 (94.4%) truly assembled contig sequences in the final assembled genome.  
102 The workflow of the genome assembly is represented in (Supplemental Fig S1A). The statistics  
103 of assembly contigs and sequence assembled contigs are shown (Supplemental Table S2.1)  
104 and the scaffold summary of the genome is given in Table 1.

105

106 The completeness of the Peepal tree genome assembly was assessed with the BUSCO tool.  
107 This resulted that 76.5% (232 out of 303 genes) and 84.1% (1210 out of 1440 genes) of genes  
108 being conserved single-copy orthologs in eukaryotic and plant universal data sets, respectively.  
109 Out of 232 complete genes in the Eukaryota database, 214 are single-copy orthologs, 18 are  
110 duplicates, 57 are fragmented and 14 are missing; out of 1210 complete genes in the  
111 Embryophyte database 1173 are single-copy orthologs, 37 are duplicates, 105 are fragmented  
112 and 125 are missing (Supplemental Fig 2A and 2B).

### 113 **Genome and pathways annotation**

114 We identified 35,093 protein-coding genes with the complete structures in the Peepal tree  
115 genome (Supplemental File S7.1 and S7.2). RNA-seq data from two leaf tissue of the Peepal  
116 tree and alternative reference ESTs from *Morus notabilis* and *Arabidopsis thaliana* protein  
117 sequences were used as protein homology evidence during genome annotation. Of the 35,093  
118 genes predicted, 81.86 % (28,729 genes) were having the RNA-seq evidence. About 76.3 per  
119 cent of RNA-seq reads from the leaf tissue from night and day were mapped to the annotated  
120 genes of the Peepal tree. The complete set of annotated genes and their amino acid sequences  
121 were used in the Kyoto Encyclopedia of Genes and Genomes (KEGG) pathway analysis  
122 (Moriya et al., 2007), resulting in metabolism, biosynthesis of secondary metabolites, genetic  
123 and environmental information processing, signal transduction pathway genes were common

124 and several others were found. The top 5 highest gene count for pathways like Ribosome (123  
125 genes), Spliceosome (96 genes), Oxidative phosphorylation (86 genes), Thermogenesis (82  
126 genes), and RNA transport (74 genes). As importantly candidate genes were also found for  
127 human disease pathways like Huntington's disease (68 genes), Parkinson's disease (57 genes),  
128 Alzheimer's disease (55 genes) and others listed in (Supplemental Table S2.4).

### 129 **Protein family and Gene Ontology analysis**

130 The protein family (Pfam) ID and Gene Ontology (GO terms) were assigned to genes using an  
131 InterProScan module (Jones et al., 2014). Out of 35,093 genes, 24,163 consisted of Pfam IDs  
132 that were distributed across 3759 types of Pfam domains and their gene ontology (GO) terms  
133 were also identified. The Pfam domain consisting of proteins that were large in the Peepal tree  
134 genome included 3-Deoxy-D-manno-octulosonic-acid transferase, Ring finger domain, PPR  
135 repeat family, Helix-loop-helix DNA-binding protein, DYW family of nucleic acid  
136 deaminases, Lysine methyltransferase, Putative GTPase activating protein for Arf, Ankyrin  
137 repeats and others were listed in (Supplemental File S8). Similarly, the protein families were  
138 identified for the unique characterised transcripts of RNA data, out of 26,691 transcripts, 19175  
139 consists Pfam IDs that were distributed across 3977 types of Pfam domains and their gene  
140 ontology terms were also identified (Supplemental File S9).

141 The Catalase is an antioxidant enzyme known to catalyze  $H_2O_2$  into water and oxygen. The  
142 Catalase gene (FRLM\_016351-RA) and its isozyme CAT1 Catalase isozyme 1  
143 (FRLM\_016350-RA), (FRLM\_012250-RA) structural gene were identified in the genome of  
144 the Peepal tree. Two catalase genes were identified in differential expression data, KatE  
145 enciphers as a monofunctional catalase and KatG enciphers as a catalase-peroxidase. KatE is  
146 known as CatB expression in the day (FPKM – 937.49) and night (FPKM – 1786.02) transcript  
147 abundance. KatG expression in the day (FPKM – 162.03) and night (FPKM – 81.53) transcript

148 abundance. KatE gene has been involved in physiological pathways like Glyoxylate and  
149 dicarboxylate metabolism, Tryptophan metabolism, MAPK signalling pathway – plant, FoxO  
150 signalling pathway, serine-pyruvate transaminase and KatG Tryptophan metabolism, Tyrosine  
151 metabolism, Biosynthesis of secondary metabolism, Drug metabolism.

## 152 **Identification of orthologous and singleton genes**

153 To understand the orthologous gene evolution and relationships across the species, we  
154 performed the orthologous gene detection for the Peepal tree with the other 5 species.  
155 Orthologous gene prediction with multiple species could be called part of the comparative  
156 genomic study. The predicted proteins from the genome study were considered to be proteomes  
157 of the species that were used for orthologous gene prediction and clustering. Clustering of  
158 genes provides information about taxonomic and phylogenetic classifications of genes, it helps  
159 in understanding the origin, evolution and other molecular characteristics of the genus and  
160 species. Orthologous clustering of the proteomes of six species inclusive of model organism *A.*  
161 *thaliana* and Ficus closest species *M. notabilis* and other species of closely related Moraceae  
162 family were chosen for the analysis. *F. religiosa*, *A. thaliana*, *M. notabilis*, *Cannabis sativa*,  
163 *Prunus persica*, and *Ziziphus jujuba* formed 24310 orthologous gene clusters and these genes  
164 are conserved within the species. The number of specific orthologous gene clusters in *F.*  
165 *religiosa*, *A. thaliana*, *M. notabilis*, *C. sativa*, *P. persica*, and *Z. jujuba* were 15016, 16170,  
166 16517, 15921, 16655 and 17235 respectively. However, 1184 single-copy gene clusters were  
167 found across the six species and specific singletons for *F. religiosa*, *A. thaliana*, *M. notabilis*,  
168 *C. sativa*, *P. persica*, and *Z. jujuba* were 10154, 4469, 2284, 1912, 1802, 4209, respectively  
169 (Fig 3A). The identified single copy clusters were able to suggest the taxonomic and  
170 phylogenetic relationships among a group of species. Based on single-copy orthologous  
171 clustering, we deduced the phylogenetic tree for the *F. religiosa* and the other five species. A

172 phylogenetic tree was constructed based on a multiple sequence alignment (MSA) and  
173 Neighbour-Joining (NJ) method. It was found that *F. religiosa* is closely related to *M. notabilis*  
174 followed by *C. sativa*, *Z. jujuba*, *P. persica*, and *A. thaliana* (Supplemental Fig 3B).

### 175 **Repeats in the genome of Peepal tree**

176 Repeat library building and repeat identification were performed using the ReapeatModeller  
177 and RepeatMasker tools ([www.repeatmasker.org](http://www.repeatmasker.org)) respectively. *De novo* repeat identification  
178 resulted in 53.55% (269.62Mb) repetitive sequences in the Peepal tree genome. The RNA  
179 elements, long terminal repeats (LTR) high constitute about 5% repeats and 43.71% of the  
180 repeats did not belong to any of the annotated repeats families. The percentage of repetitive  
181 sequences in the Peepal tree genome is similar to its Moraceae family, the closest species  
182 mulberry (*M. notabilis*) genome (47%) and *Ficus macrocarpa* which is composed of 46.5%.  
183 The repetitive sequences were classified into known categories, such as LINE1 (0.19%), long  
184 terminal repeat retrotransposon (5.09%), DNA transposons (1.09%), and simple repeats  
185 (3.25%) and unclassified (43.71%) (Supplemental Table S2.3).

### 186 **Simple sequence repeats (SSRs)**

187 We predicted SSRs from the assembled Peepal tree genome. In total, 7,99,992 SSRs were  
188 identified on 2,67,593 sequences, which is composed of mono- (6,06,169), di- (1,43,113), tri-  
189 (34,327), tetra- (11,791), penta- (2,911), and hexa- (1,681) type repeats (Supplemental Table  
190 S3). Among mono repeats, the 'A/T' (73.91%) type was the highest followed by 'C/G'  
191 (1.87%). Similarly, 'AT /TA', 'AG/CT', 'AC/GT' and 'CG/CG' type of di repeats were in  
192 9.8%, 2.76%, 1.41% and 0.09% fractions, respectively. 'AAT/ATT', 'AAG/CTT'  
193 'ATA/TAT', 'TTA/TTC', and 'GAA/TAA', were the most abundant tri repeats and 'AAAT'  
194 was most predominant in tetra repeats. The detailed distribution of all types of repeats is shown  
195 in (Supplemental File S11.1 and S11.2).



## 196 **Transcription Factors (TFs)**

197 Transcription factors act in regulating the gene expression due to several external and internal  
198 signals by activating or suppressing downstream genes. The MAKER annotated protein  
199 sequences of Peepal tree genome assembly were used for BLAST analysis with the Plant  
200 Transcription Factor Database v5.0 (Jin et al., 2017) using *A. thaliana* protein sequence as a  
201 reference.

202 A total of 1,264 protein sequences of genome annotated 35,093 protein-coding genes have a  
203 shred of evidence for 56 families of Transcription factors (TFs) (Supplemental File S10.1). The  
204 TFs families include the abundant ERF, M-type MADS, ARF, DBB, MIKC MADS, WOX,  
205 C3H, G2-like, MYB, TALE, B3, HB-other and MYB-related family proteins. The differential  
206 gene expressed data from the day and night period collected leaf tissue transcriptome were  
207 analysed to identify the TFs. From the day period sample, the 2 transcripts had specific TFs  
208 like C3H family protein and nuclear factor Y, subunit A7 (NF-YA7) and in the night period  
209 sample, the 6 transcripts had specific TFs like ERF family protein, CONSTANS-like 2, MYB-  
210 related family protein (Supplemental File S10.2).

## 211 **Transcriptome sequencing, assembly and annotation**

212 *De novo* transcriptome assembly was performed for the mature leaf samples of the Peepal tree  
213 collected during the day and night periods. The assembly was performed for each sample and  
214 also combined assembly for the reads of both samples. The combined transcriptome assembly  
215 was performed and contributed to 152.8-Mb assembled bases with the N50 length of 2076 bp  
216 and an average transcript length of 13.16 Kb and 42.17% GC content. The transcriptome  
217 assembly and annotation workflow are given in (Supplemental Fig 1B). The statistics of  
218 assembly contigs and sequence assembled contigs are shown in Supplementary Table S4.1.

219 The *de novo* assembled transcript (1,16,038) sequences were processed for annotation. *De novo*  
220 assembled transcripts were clustered to exclude the redundant transcripts and identified the  
221 unique transcripts (26,691) sequences. The statistics of Unigenes are given in Table 2. *De novo*  
222 assembled transcripts and Unigenes were annotated to find the structural and functional genes.  
223 The differential expressed genes from the day and night periods with their FPKM values are  
224 given in Supplementary Table S6.

### 225 **Non-coding RNA genes in Peepal tree genome**

226 Based on a coding potential calculator (CPC), *de novo*-based assembled transcripts (26,691)  
227 were further categorized into protein-coding (19,911) and non-coding (6,780). For the non-  
228 coding (6,780) transcripts, 4219 transcripts were aligned on genome annotated genes using  
229 BLASTN, the remaining 2561 transcripts were considered non-coding. A total of  
230 30,973 Cufflinks assembled transcripts (reference-based alignment with genome assembly)  
231 were further categorized into protein-coding (7,163) and non-coding (23,810). Out of 23,810  
232 non-coding transcripts, 14605 were having alignment to genome annotated genes using  
233 BLASTN. Further, categorization of specific day and night sample transcripts resulted in  
234 protein-coding 6,628 and 7,339 and non-coding of 20,528 and 25,494 transcripts respectively.  
235 From those non-coding transcripts of day and night, 18,893 and 22,232 transcripts got aligned  
236 MAKER-P predicted genes using BLASTN. The remaining transcripts were considered to be  
237 non-coding transcripts, as we did not find any match to predicted gene evidence to support  
238 them.

239 **miRNAs:** miRNAs are a major class of non-coding RNAs. Based on the homology search, we  
240 have identified the microRNA precursors using the miRbase database (<http://www.mirbase.org>).  
241 These microRNAs belong to MIR396, MIR2916, MIR156, MIR164, MIR6236, MIR166,  
242 MIR168, MIR395 families. Among the identified miRNAs, MIR408 was found specific to the

243 night period transcripts of the Peepal tree. On the genome, MIR 408 was found on the genes  
244 like TPK5 Two-pore potassium channel 5, prfA peptide chain release factor 1 and also on  
245 proteins of unknown function. MIR408 is a highly conserved microRNA in plants. miR408 has  
246 enriched photosynthesis by mitigating the efficiency of irradiation utilization and the capacity  
247 for carbon dioxide fixation ( (Pan et al., 2018).

248

249 In the *de novo*-based transcriptome data, the non-redundant unigenes were used to identify the  
250 microRNAs MIR168 and MIR166 and their homologs were found on two of the transcripts.  
251 We identified the miRNAs on genomic scaffolds based on mapping the transcriptome data to  
252 the genome. This provides the information of miRNAs specific to the day and night leaf tissue  
253 transcriptome. We identified 23 and 25 pre-miRNA expressions in the day and night period  
254 respectively (Supplemental Table S5.1). The statistics of transfer RNAs (tRNA) were identified  
255 and their details are given in the Supplemental Table S5.2.

256

### 257 **Elucidation of carbon fixation pathway in Peepal tree**

258 The study was conducted to analyze the gene expression patterns in the leaf tissues of the  
259 Peepal tree under two conditions the day period (2 PM) and the night period (2 AM). Through  
260 the pathway analysis, the candidate genes for carbon fixation pathways like Crassulacean Acid  
261 Metabolism (CAM) pathway, Calvin-Benson cycle (C3) pathway and C4 pathway were  
262 identified and estimated based on their transcript abundance. The transcriptome data contained  
263 20 putative genes involved in the carbon fixation module of CAM, C3 and C4 including for  
264 the key fructose-bisphosphate aldolase class I, fructose-1,6-bisphosphate,  
265 phosphoenolpyruvate carboxylase (PEPC/PPC), phosphoenolpyruvate carboxylase kinase  
266 (PPCK), NAD<sup>+</sup> and NADP<sup>+</sup>, malate dehydrogenase (MDH), pyruvate orthophosphate  
267 dikinase (PPDK) (Supplemental Table S7). The differential genes mapped to the reference

268 carbon fixation pathway on the KEGG database are provided in (Supplemental Fig 4) and the  
269 diagrammatic representation of the genes involved in the pathway is shown in (Supplemental  
270 Fig 5A).

271 The signature genes responsible for the CAM cycle were expressed in the Peepal tree during  
272 the night. The phosphoenolpyruvate carboxylase kinase (PPCK), NAD(P)-ME (*maeB*) and  
273 Malate dehydrogenase (MDH) genes were highly enriched in the photosynthetic leaf tissue  
274 collected during the night period than day period. It indicates that the Peepal tree adapts to the  
275 CAM pathway and is able to fix nocturnal carbon dioxide using the PEP carboxylase (PEPC)  
276 enzyme and accumulate malate by the enzyme malate dehydrogenase in the large vacuoles of  
277 their cells. The transcriptomic genes from the Peepal tree were mapped to the complete  
278 pathway of the CAM cycle in the KEGG database.

279

280 Ribulose-bisphosphate carboxylase (RuBP carboxylase or *rubisco*) small chain enzyme is  
281 enriched in leaf tissue collected during day period (2 PM). Rubisco is the most abundant protein  
282 in chloroplasts. The glyceraldehyde-3-phosphate dehydrogenase (NADP<sup>+</sup>) is enriched in day  
283 collected leaf tissue, the enzyme responsible for the reversible conversion of glyceraldehyde  
284 3-phosphate to ribulose bisphosphate using ATP, the acceptor for CO<sub>2</sub> and completes the  
285 Calvin-Benson Cycle (C<sub>3</sub> cycle). For C<sub>3</sub> cycle pathway except 3 genes, all other genes got  
286 mapped in the database. The 3 genes were EC 4.1.2.22 fructose-6-phosphate phosphoketolase  
287 and EC 4.1.2.9 phosphoketolase evolved from fungal, and EC 2.7.1.14 sedoheptulokinase  
288 evolved from animal kingdom and these were not found in Peepal tree for C<sub>3</sub> cycle.

289

290 In the C<sub>4</sub> Dicarboxylic cycle, the high expression of glutamate-glyoxylate aminotransferase  
291 enzyme (GGAT) in the leaf tissue collected during the night period (2 AM) indicates the  
292 photorespiration in the Peepal tree. The carbon fixation begins in the mesophyll cells, where

293 CO<sub>2</sub> is converted into bicarbonate. It adds the 3-carbon acid phosphoenolpyruvate (PEP) by  
294 an enzyme called phosphoenolpyruvate carboxylase. The product of this reaction is the four-  
295 carbon acid oxaloacetate, which is reduced to malate another four-carbon acid. The second  
296 highest expression is NADP-malate dehydrogenase (MDH), which converts the oxaloacetate  
297 generated by PEPC to malate. The genes from Peepal tree differential expression data had a  
298 complete map to the C<sub>4</sub> cycle. The gene expression pattern of the carbon-fixation pathway in  
299 the Peepal tree suggests that the plant switches between the C<sub>3</sub>, C<sub>4</sub> and CAM cycles during  
300 the diurnal and nocturnal period. The Fragments Per Kilobase of transcript per Million mapped  
301 reads (FPKM) and Trimmed Mean of M-values (TMM) values for the genes expressed for  
302 carbon fixation pathway are shown in Fig 6A, B, C and 7A, B and C.

### 303 **Discussion**

304 In this study the genomics and transcriptomics data was generated and also annotated for  
305 keystone species Peepal tree (*F. religiosa*). This plant species is well known for Buddha's  
306 enlightenment while he was meditating underneath this tree. This tree is being worshipped as  
307 birth giving, regenerative and medicinally valued for many diseases and this culture is spread  
308 across Asia. Generally, Peepal tree is known for high production of oxygen throughout the day  
309 as well as during night time, but there is a lack of scientific evidence. We used two Next-  
310 Generation Sequencing technologies to sequence the genome of Peepal tree and described the  
311 whole genome. The photosynthetic tissues of distinct condition were used for transcriptome  
312 sequencing and to understand the genes, proteins and molecular pathways. The assembled  
313 genome resulted in size of 381-Mb with 35,093 protein-coding genes based on mRNA evidence  
314 used for annotation. The N50 value 6385bp was observed. A total of about 53% of the genome  
315 consisted of the repetitive sequences. The GC content of the genome is 33.70%, indicating that  
316 Peepal tree genome is AT rich. The transcriptome analysis resulted in the 26,691 unique

317 transcripts. Based on BUSCO analysis, 84.1% of genes had completeness of Peepal tree  
318 genome assembly for the conserved genes in plant universal single-copy orthologs data set  
319 (embryophyta database) and 81.5% had single-copy orthologs in the genome; and 76.5%  
320 which indicates the completeness of Peepal tree genome assembly for the conserved genes in  
321 eukaryotic universal single-copy orthologs data set (eukaryota database) and 70.6% had single-  
322 copy orthologs in the genome, it has provided the confidence for the downstream analyses. The  
323 protein-coding genes identified in the Peepal tree are related to other plant genomes sequenced  
324 over the decades. Similarly, in our laboratory *Santalum album* (Sandalwood) genome was  
325 sequenced with the prediction of 38,119 protein-coding genes based on mRNA and peptide  
326 evidence (Mahesh et al., 2018).

327 To understand the molecular functions in the photosynthesis of the Peepal tree in the diurnal  
328 and nocturnal periods. We have performed a downstream analysis of the genome and  
329 transcriptome of the Peepal tree. Analysis of microRNAs, TFs, and carbon fixation pathways  
330 has led to the understanding of the photosynthesis in the Peepal tree. The long non-coding  
331 RNAs have important roles in metabolic, physiological and biological processes of the cell  
332 (Jones-Rhoades et al., 2006). MIR408 has been reported to target various blue copper protein  
333 members and phytocyanin family (Jones-Rhoades et al., 2006), (Sunkar et al., 2005). In  
334 *Arabidopsis*, miR408 responds to copper deficiency and light (Abdel-Ghany and Pilon, 2008).  
335 In *Oryza sativa* MiR408 plants were efficient at saving and converting light energy into sugars,  
336 suggesting that miR408 might promote grain yield through regulating the phytocyanin (PC)  
337 content and photosynthesis by down-regulating UCL8 uclacyanin (UCL) gene of the  
338 phytocyanin family. So, MIR408 found specific expression in transcripts of night period leaf  
339 tissue of Peepal tree indicated the absence of light (no expression in day period) and  
340 accumulation of sugars in the plant during dark. It also aids in photosynthesis by enhancing the  
341 carbon fixation.

342

343 Transcription factors like C3H family proteins were identified by their motif of three cysteines  
344 and one histidine residue, and they play an important role in the regulation of growth,  
345 developmental processes and environmental responses in plants (Liu et al., 2020). In plants,  
346 the nuclear factor-YA has a role in drought stress responses. In rice, NF-YA7 is involved in  
347 the drought tolerance pathway which is independent of Abscisic acid manner (Lee et al., 2015).  
348 Expression of C3H and NF during the day period could be referred for plant growth and  
349 development in the Peepal tree. The Ethylene response factor ERF105 showed the cold-  
350 regulated transcription factor gene of Arabidopsis and also functions in the freezing tolerance  
351 and cold acclimation (Bolt et al., 2017). In the Peepal tree, ERF is expressed during the night  
352 period indicating the accumulation of humidity in the dark. MYB -related family proteins like  
353 REVEILLE 1 (RVE1) and late elongated hypocotyl gene (LHY) are expressed during the night  
354 period. RVE1 functions in the circadian clock and auxin pathways (Rawat et al., 2009) and  
355 LHY maintains the circadian rhythm in Arabidopsis (Mizoguchi et al., 2002). Both the RVE1  
356 and LHY are found expressed in night-specific Peepal tree transcripts indicating the active  
357 circadian rhythms and pathways during the dark time.

358 In the current study, Catalase gene expression was found high in night period transcript  
359 abundance of Peepal tree leaf tissue. A previous study on the Peepal tree showed that leaf tissue  
360 collected in night time exhibited the scotoactive opening of stomata during the night, which  
361 indicates that through the stomatal opening molecular oxygen ( $O_2$ ) is released by the action of  
362 catalase enzyme on hydrogen peroxide ( $H_2O_2$ ) (Smitha et al., 2009). Peepal tree plants grown  
363 in adverse habitats showed 55% higher  $H_2O_2$  production with about a 30% increase in  
364 peroxidase activity (Smitha et al., 2009). The physiological interaction between catalase and  
365 its substrate  $H_2O_2$  in the plant was determined by quantifying  $H_2O_2$  and assaying the catalase,

366 in which catalase showed a 4-fold increase in activity, especially during the night. Peepal tree  
367 has a higher amount of H<sub>2</sub>O<sub>2</sub> deposition during the night than day time, which is an indication  
368 of pathway switching between carbon fixation pathways. The transcriptomic sequencing from  
369 time-structure diurnal (2 PM) and nocturnal (2 AM) leaf samples showed the gene expression  
370 patterns of the carbon fixation pathway. The gene expression of mRNA in the C<sub>3</sub>, C<sub>4</sub> and CAM  
371 cycles indicated that depending on the carbohydrate, amino acids biosynthesis and metabolism  
372 and environmental conditions the plant switches between these three cycles in a time-structured  
373 manner.

374 The enzymatic steps involved in the CAM cycle are similar to the C<sub>4</sub> plant's (Christin et al.,  
375 2014). Plants adapt to the CAM cycle to grow during water constraints and increase the level  
376 of carbon dioxide uptake than their C<sub>3</sub> and C<sub>4</sub> cycles (NOBEL, 1991). The photorespiration in  
377 C<sub>3</sub> plants dissipates more than 25% of the carbon fixed by means of the photosynthesis  
378 (Sharkey, 1988). The day period mRNA data showed that the Peepal tree may carry out the  
379 diurnal carbon fixation by the C<sub>3</sub> cycle. GGAT plays an important role in the biosynthesis and  
380 metabolism of major amino acids. GGAT is involved in the photorespiratory process. It  
381 catalyzes the reaction of glutamate and glyoxylate in the 2-oxoglutarate and glycine (Igarashi  
382 et al., 2003). High expression of GGAT in the C<sub>4</sub> cycle indicates that there could be  
383 photorespiration in the Peepal tree during the night.

384

385 This study of Peepal tree provides the information on plants using the CAM pathway to fix  
386 nocturnal carbon dioxide using the PEP carboxylase (PEPC) enzyme and the accumulation of  
387 malate by the enzyme malate dehydrogenase in the large vacuoles of their cells. The key CAM  
388 genes in C<sub>3</sub> species expressed in time periods suggested that ancestral expression patterns  
389 required for CAM may have pre-dated its origin in *Yucca* (Heyduk et al., 2019). In *Kalanchoë*  
390 *fedtschenkoi* genome study, the convergence in protein sequence and re-scheduling of diel



391 transcript expression of genes was reported to be involved in nocturnal CO<sub>2</sub> fixation, stomatal  
392 movement, heat tolerance, circadian clock, and carbohydrate metabolism with the other CAM  
393 species in comparison with non-CAM species (Yang et al., 2017).

394

395 Some of the previous studies in the pineapple genome revealed the gene lineage transition from  
396 C<sub>3</sub> photosynthesis to CAM, and CAM-related genes exhibit a diel expression pattern in  
397 photosynthetic tissues (Ming et al., 2015b). The evolution of CAM in *Agave* from  
398 C<sub>3</sub> photosynthesis shows that the core metabolic components required for CAM have ancient  
399 genomic origins which could be traceable to non-vascular plants while regulatory proteins  
400 required for diel re-programming of metabolism have shared among the recent origin of C<sub>3</sub>,  
401 C<sub>4</sub> and CAM species (Yin et al., 2018).

402

403 In summary, the genome data and transcript abundance evidence indicate the molecular switch  
404 in the carbon fixation pathway of the Peepal tree (*F. religiosa*) during the day and night periods  
405 depending on its physiological and environmental conditions. Our study is a foundation for  
406 further experiments to determine the underlying mechanisms in C<sub>3</sub>, C<sub>4</sub> and CAM metabolism.

#### 407 **Conclusions**

408 In this study, we generated the genomic and transcriptomic data for Peepal/Bodhi tree.  
409 Genomic data pathway analyses identified the genes associated with several physiological,  
410 biochemical, metabolic and disease pathways. Differential expression data from diurnal and  
411 nocturnal leaf tissue samples of Peepal revealed gene expression patterns in the Carbon fixation  
412 pathway during light and dark. The transcript abundance indicates that plants could switch  
413 between all the three C<sub>3</sub>, C<sub>4</sub> and CAM pathways. Further in-vitro studies have to be  
414 experimented with in future to understand clear. The well-annotated genome for the Peepal tree

415 will have broader implications for studies regarding the physiology, evolution, conservation of  
416 species and human neurological diseases.

417

## 418 **Methods**

### 419 **Collection of leaf sample and extraction of nucleic acids**

420 The mature leaves were collected from a Peepal tree (15 years old) at DNA foundation,  
421 Anuganalu village, Hassan District, India (13.0647° N, 76.0363° E). Genomic DNA was  
422 extracted from the leaves using the Qiagen Plant Genomic DNA Miniprep kit, and the quality  
423 and quantity of DNA were confirmed using the Nanodrop. From the same Peepal tree, during  
424 the day (2 PM) and night (2 AM) periods, the leaf samples were collected and immediately  
425 placed on the dry ice. Total RNA was isolated from the leaf samples using the Qiagen Plant  
426 RNA isolation kit method and was treated with RNase-free DNase I for 30 min at 37 °C (New  
427 England BioLabs) to remove residual DNA. RNA integrity and quantity were confirmed on  
428 Qubit and Tape station using dsRNA HS kit from Invitrogen and RNA screen tape from Agilent  
429 respectively.

### 430 **DNA and RNA library preparation and sequencing**

431 Whole-genome shotgun DNA library preparation was performed using Illumina TrueSeq DNA  
432 sample preparation kit (FC-121-2001). The paired-end (PE) (2 x 100 nts) sequencing was  
433 carried out using Illumina HiSeq 1000 at the Next Generation Genomics Facility at the Centre  
434 for Cellular and Molecular Platforms (C-CAMP), Bengaluru. Also, to increase the size of  
435 genome data, we sequenced the genome with paired-end (PE) (2 x 100 nts) using the MGISEQ-  
436 2000 platform at Bengaluru Genomics Center (BGC) Pvt. Ltd, Bengaluru.

437 The RNA libraries were prepared using “TruSeq RNA Library Prep Kit v2 from Illumina®”  
438 with Illumina standardized protocol. The RNA libraries were quantified on Qubit (dsDNA HS  
439 kit) and validated on the TapeStation instrument (D1000 screen tape). These RNA libraries  
440 were used for sequencing with the Illumina platform at the Bengaluru Genomics Centre (BGC)  
441 Pvt. Ltd, Bengaluru.

#### 442 **Genome assembly**

443 Each of the Illumina and MGISEQ-2000 raw reads were processed for a quality check using  
444 the FastQC v0.11.6 tool [8]. Then filtering and trimming of raw reads were done to remove the  
445 low complexity bases using the TrimGalore-0.4.5  
446 (<https://www.bioinformatics.babraham.ac.uk/projects/trimgalore/>) and reads having quality  
447 value  $Q > 20$  and length above 20 bases were taken for constructing the assembly. The separate  
448 Illumina and MGI Seq generated raw reads were used to construct the assembly using the tools  
449 SPAdes-3.13.0 (Bankevich et al., 2012) and MaSuRCA-3.2.9 (Zimin et al., 2013) respectively.  
450 The parameters were the default kmer sizes of 21, 33, and 55 for Illumina assembly. The  
451 constructed assemblies were used to build the super scaffolds using the tool SSPACE standard  
452 v3.0 (Boetzer et al., 2011).

453 The combined Illumina HiSeq and MGISEQ raw reads were used to construct the hybrid  
454 assembly using the assembly tool SPAdes-3.13.0 (Bankevich et al., 2012). The parameters  
455 were the default k-mer size 21, 33, 55 and also set 77 mer for it. The gaps in the assembly were  
456 closed by GMcloser-1.6.2. tool (Kosugi et al., 2015). The statistics of the assembly were  
457 obtained using the tool Quast version4.6.1 (Gurevich et al., 2013). The completeness and  
458 evaluation of the assembly were assessed using the tool BUSCO v3 (Simão et al., 2015) with  
459 the Embryophyte and Eukaryota database.

460 **Structural gene prediction and functional annotation:**

461 Peepal tree assembled scaffolds were processed for structural and functional gene annotation  
462 using the MAKER-P v.2.31.10 software (Campbell et al., 2014). The RNA-sequenced data of  
463 *Morus notabilis* (He et al., 2013) consists of expression sequence tags (ESTs) and the GFF  
464 (Gene finding format) file which contains the gene features and structures of genes, protein  
465 data of *A. thaliana* and RNA-sequence data of Peepal tree were imported as evidence for  
466 annotation support. The structural and functional annotation of predicted genes and proteins  
467 were performed using BLASTP in the Uniprot database. The protein family, structures and  
468 gene ontology (GO) terms were identified for protein-coding genes using InterProScan-V5.27-  
469 66.0 (Jones et al., 2014).

470 **Prediction of repetitive elements: TEs and SSR**

471 The RepeatModeller-open-1.0.11[17] and RepeatMasker-4.0 tools [18] were used for repeat  
472 library building and repeat identification in the assembly respectively. The MicroSatellite  
473 Identification tool (MISA) (Thiel et al., 2003) was used for the identification of SSRs from  
474 genome assembled sequences of *F. religiosa*. The parameters were set to identify perfect di-,  
475 tri-, tetra-, penta- and hexa nucleotide motifs with a minimum threshold of 6, 5, 5, 5 and 5  
476 repeats, respectively.

477 **Prediction of transcription factor families**

478 The prediction of transcription factor (TF) families in Peepal tree transcriptome was done using  
479 Plant Transcription Factor Database v5.0 (Jin et al., 2017).

480

481 **Non-coding RNA genes**

482 The transfer RNAs in the Peepal tree genome were found using tRNAscan-SE (v2.0.3) (Lowe  
483 and Eddy, 1997) with the ‘eukaryotes’ option. tRNAscan-SE software deployed with the  
484 covariance models, identifies the primary sequence and secondary structure information of  
485 tRNA and gives the complete tRNA genes for the query genome and transcriptome sequences.  
486 tRNAscan-SE software is integrated with Infernal v1.1 to enhance the tRNA search with better  
487 covariance and other updated models. Using the isotype-specific covariance model it provides  
488 the functional classification of tRNAs and in the first pass search cutoff score, 10 is set. The  
489 miRbase database (<http://www.mirbase.org>) was used for the identification of putative  
490 miRNAs in the genome and unique identified transcripts sequence data based on the homology  
491 search. The long non-coding RNAs (lncRNAs) were identified with the Coding Potential  
492 Calculator tools (Kong et al., 2007).

493

#### 494 **Transcriptome sequencing, assembly and annotation**

495 High-quality stranded RNA sequencing (ssRNA-seq) reads were assembled into putative  
496 transcripts using Trinity v2.9.0 (Grabherr et al., 2011). Assembled transcripts were passed  
497 through Transdecoder v5.02 to predict the coding sequences and also the transcripts were  
498 clustered to find the unigenes by removing the redundant transcripts using the tool CDHIT-est  
499 v.0.0.1 (Li and Godzik, 2006). Transcripts assembled from Trinity and CDHIT-v0.0.1 were  
500 used in downstream analyses for gene prediction. Unigenic transcripts were used to predict the  
501 putative genes using the NCBI non-redundant (nr) database using the BLASTX program and  
502 proteins were predicted from the Uniprot database using the BLASTP program. The Trinity  
503 assembled transcripts were annotated using Trinotate- V3.11. The raw reads were mapped to  
504 scaffold assembled genome using Cufflinks and considered as reference assembly.

505

#### 506 **Transcript quantification and differential gene expression analysis**

507 The estimation of transcripts abundance was determined using RNA-Seq by Expectation-  
508 Maximization (RSEM) tool (Li and Dewey, 2011), which quantifies transcript level abundance  
509 from RNA Seq data. RSEM first generates and pre-processes a set of reference transcript  
510 sequences and then aligns reads to reference transcripts followed by an estimation of transcript  
511 abundances. Normalised transcripts obtained from the transcript quantification methods were  
512 used in the next step for analyzing the differential gene expression of genes. FPKM and  
513 Trimmed Mean of M-values (TMM) are calculated to understand the expression levels of genes  
514 in day and night collected samples of Peepal tree. The gene expression was estimated using  
515 FPKM and TMM value minimum  $\geq 1$  for further analysis. The TMM value was used to cluster  
516 the genes according to their expression pattern using the edgeR package in the R tool. The  
517 parameters used in the differential analysis were a probability value P-value of 0.001 and a fold  
518 change value of 2. The expression value was also determined for assembled transcripts to verify  
519 the expression of genes predicted from gene models. The differentially expressed genes were  
520 annotated using BLAST2GO Annotation software (Conesa et al., 2005).

## 521 **Pathway Analysis**

522 The annotated genes from the assembled genome and the differentially expressed genes from  
523 the Peepal tree leaf tissues collected during day (2.00 PM) and night (2.00 AM) were used for  
524 pathway analysis in the Kyoto Encyclopedia of Genes and Genomes (KEGG) database (Moriya  
525 et al., 2007) using the BBH (bi-directional best hit) method. It provided the list of pathways  
526 where the candidate genes were mapped based on the orthologous homology alignment.

## 527 **Supplementary Information**

528 **Supplemental Table S1:** Details on raw sequence data of *F. religiosa* genome and  
529 transcriptome

530 **Supplemental Fig S1A:** Flow chart of *De Novo* Whole Genome Analysis (WGA) of *Ficus*  
531 *religiosa*.

532 **Supplemental Table S2.1 and S2.2:** Contig assembly statistics of *F. religiosa* genome and  
533 Scaffold assembly and annotation statistics of *F. religiosa* genome

534 **Supplemental Text File S7.1 and S7.2:** Annotated gene sequence and protein sequences of *F.*  
535 *religiosa*

536 **Supplemental Fig 2A:** BUSCO Assessment results using the plant universal single-copy  
537 orthologs (embryophyta database).

538 **Supplemental Fig 2B:** BUSCO Assessment results using the eukaryote universal single-copy  
539 orthologs (eukaryota database).

540 **Supplemental Table S2.4:** Top 10 pathways with highest gene counts in *F. religiosa* genome

541 **Supplemental Text File S8:** Protein family ID's for the annotated genes of *F. religiosa*

542 **Supplemental Text File S9:** Protein family ID's for the unique transcripts of *F. religiosa*

543 **Supplemental Fig 3B:** Phylogenetic analysis of *Ficus religiosa* with other plant species like  
544 *A. thaliana*, *C. sativa*, *M. notabilis*, *Z. jujuba*, *P. persica*

545 **Supplemental Table S2.3:** Repeat content in the assembled *F. religiosa* genome

546 **Supplemental Table S3:** Simple sequence repeats (SSR) prediction in the genome of *F.*  
547 *religiosa*

548 **Supplemental File S11.1 and S11.2:** Distribution to different SSR repeat type classes and  
549 statistics

550 **Supplemental File S10.1:** Transcription factors identified in the annotated genes

551 **Supplemental File S10.2:** Transcription factors identified in Day and Night period transcripts

552 **Supplemental Fig 1B:** Flow chart of *De novo* Transcriptome Analysis of *Ficus religiosa*.

553 **Supplementary Table S4.1:** Assembly Statistics of *F. religiosa* Transcriptome

554 **Supplementary Table S4.2:** Uni-genes Analysis from *F. religiosa* Transcripts

555 **Supplementary Table S6:** Differential expressed genes from day and night period with their  
556 FPKM values

557 **Supplemental Table S5.1:** Details on long non-coding RNAs, miRNAs in *De novo* transcripts,  
558 reference-based transcripts and genome

559 **Supplemental Table S5.2:** Statistics of Transfer RNAs predicted in the genome

560 **Supplemental Fig 4:** Graphical representation of candidate genes of *Ficus religiosa* involved  
561 in Carbon fixation pathway.

562 **Supplemental Fig 5A:** Diagrammatic representation of candidate genes of *of* Carbon fixation  
563 pathway (C<sub>3</sub>, C<sub>4</sub>, CAM cycle).

#### 564 **Data Availability**

565 The raw sequence reads have been deposited under NCBI Sequence Read Archive (SRA)  
566 accession numbers SRR7244210 (Illumina sequenced *F. religiosa* WGS), SRR13827064  
567 (MGISEQ sequenced *F. religiosa* WGS), SRR7343291 (*F. religiosa* transcriptome). The  
568 whole-genome shotgun projects have been deposited at DDBJ/EMBL/Genbank under the  
569 accession JAFMPE000000000 and transcriptome data has been deposited at  
570 DDBJ/EMBL/Genbank under the accession GJAV000000000.

#### 571 **Declaration**

572 The authors declare no conflict of financial interests.

#### 573 **Acknowledgement**

574 We would like to thank Tata Education and Development Trust fellowship (01/2018-2019)  
575 provided for Ashalatha K L for her PhD programme. We acknowledge the Next Generation



576 Genomics Facility at the Centre for Cellular and Molecular Platforms (C-CAMP) and  
 577 Bengaluru Genomics Center Pvt. Ltd for supporting sequencing and analysis. We are grateful  
 578 for the MGI team, Hong Kong for sequencing the whole genome.

579 **Tables**

580 **Table 1:** Summary of genome assembly and annotation of Peepal genome

| Features                     | Illumina assembly | MGI assembly | Hybrid assembly | Gap closed assembly |
|------------------------------|-------------------|--------------|-----------------|---------------------|
| No. of scaffolds             | 87060             | 118027       | 121895          | 121696              |
| Largest scaffold (bp)        | 56337             | 54685        | 174746          | 174006              |
| Total assembled bases        | 264662650         | 345020555    | 386980121       | 381047120           |
| Minimum scaffold length (bp) | 56                | 300          | 78              | 78                  |
| Maximum scaffold length (bp) | 56337             | 54685        | 174748          | 174748              |
| GC %                         | 32.99             | 33.44        | 33.69           | 33.70               |
| N50 (bp)                     | 5340              | 4771         | 6482            | 6385                |
| L50                          | 13703             | 20196        | 15619           | 15539               |
| Number of annotated genes    | -                 | -            | -               | 35093               |

581

582 **Table 2:** Statistics of Uni-genes in Peepal Transcripts

|                       | Sample (Day - 2 PM) | Sample (Night - 2 AM) | Combined Sample |
|-----------------------|---------------------|-----------------------|-----------------|
| Number of genes       | 22597               | 23360                 | 26691           |
| Number of transcripts | 16912               | 16780                 | 18173           |
| Percent GC            | 46.37               | 42.42                 | 46.25           |
| Contig N50 (nts)      | 1404                | 2053                  | 1374            |
| Median contig length  | 813                 | 1011                  | 753             |
| Average Contig (nts)  | 1060.06             | 1332.73               | 1017.44         |
| Total assembled bases | 23954145            | 120608982             | 27156384        |

583 **Figure legends**

584 **Figure 3A:** Orthologous clustering of 6 species using proteome data deduced 24310  
585 orthologous gene clusters and 1184 single-copy gene clusters across the above 6 species.

586 **Figure 6:** The candidate genes involved in the C3, CAM and C4 cycle.

587 A) Calvin- Benson (C3) cycle B) Crassulacean acid metabolism (CAM) cycle C) C4 cycle. X  
588 – axis represents the genes involved pathways, Y – axis is the matrix of normalised expression  
589 trimmed mean of M (TMM) values; Blue graph – leaf tissue collected during day period (2  
590 PM), Red graph – leaf tissue collected during night period (2 AM).

591 **Figure 7:** Gene expression pattern of *F. religiosa* carbon fixation genes across the diurnal (2  
592 PM) and nocturnal (2 AM) expression data. A) C3 cycle, B) CAM cycle C) C4 cycle log2-  
593 transformed Fragments Per Kilobase of transcript per Million mapped reads (FPKM) value  
594 based expression profiles are shown.

## 595 **References**

- 596 **Bankevich A, Nurk S, Antipov D, Gurevich AA, Dvorkin M, Kulikov AS, Lesin VM,**  
597 **Nikolenko SI, Pham S, Prjibelski AD, et al** (2012) SPAdes: A New Genome Assembly  
598 Algorithm and Its Applications to Single-Cell Sequencing. *J Comput Biol* **19**: 455–477  
599 **Bhangale JO, Acharya NS, Acharya SR** (2016) Protective effect of *Ficus religiosa* (L.)  
600 against 3-nitropropionic acid induced Huntington disease. *Orient Pharm Exp Med* **16**:  
601 165–174  
602 **Bhangale JO, Acharya SR** (2016) Anti-Parkinson Activity of Petroleum Ether Extract of  
603 *Ficus religiosa* (L.) Leaves. *Adv Pharmacol Sci* **2016**: 1–9  
604 **Boetzer M, Henkel C V., Jansen HJ, Butler D, Pirovano W** (2011) Scaffolding pre-  
605 assembled contigs using SSPACE. *Bioinformatics* **27**: 578–579  
606 **Bolt S, Zuther E, Zintl S, Hincha DK, Schmölling T** (2017) ERF105 is a transcription factor  
607 gene of *Arabidopsis thaliana* required for freezing tolerance and cold acclimation. *Plant*  
608 *Cell Environ* **40**: 108–120  
609 **Campbell MS, Law M, Holt C, Stein JC, Moghe GD, Hufnagel DE, Lei J,**  
610 **Achawanantakun R, Jiao D, Lawrence CJ, et al** (2014) MAKER-P: A Tool Kit for the  
611 Rapid Creation, Management, and Quality Control of Plant Genome Annotations. *Plant*  
612 *Physiol* **164**: 513–524  
613 **Chantarasuwan B, Baas P, van Heuven B-J, Baider C, van Welzen PC** (2014) Leaf  
614 anatomy of *Ficus* subsection *Urostigma* (Moraceae). *Bot J Linn Soc* **175**: 259–281  
615 **Christin P-A, Arakaki M, Osborne CP, Bräutigam A, Sage RF, Hibberd JM, Kelly S,**

- 616 **Covshoff S, Wong GK-S, Hancock L, et al** (2014) Shared origins of a key enzyme  
617 during the evolution of C4 and CAM metabolism. *J Exp Bot* **65**: 3609–3621
- 618 **Conesa A, Gotz S, Garcia-Gomez JM, Terol J, Talon M, Robles M** (2005) Blast2GO: a  
619 universal tool for annotation, visualization and analysis in functional genomics research.  
620 *Bioinformatics* **21**: 3674–3676
- 621 **Guan Q, Tan B, Kelley TM, Tian J, Chen S** (2020) Physiological Changes in  
622 *Mesembryanthemum crystallinum* During the C3 to CAM Transition Induced by Salt  
623 Stress. *Front Plant Sci*. doi: 10.3389/fpls.2020.00283
- 624 **Gurevich A, Saveliev V, Vyahhi N, Tesler G** (2013) QUAST: quality assessment tool for  
625 genome assemblies. *Bioinformatics* **29**: 1072–1075
- 626 **He N, Zhang C, Qi X, Zhao S, Tao Y, Yang G, Lee T-H, Wang X, Cai Q, Li D, et al** (2013)  
627 Draft genome sequence of the mulberry tree *Morus notabilis*. *Nat Commun* **4**: 2445
- 628 **Heyduk K, Ray JN, Ayyampalayam S, Moledina N, Borland A, Harding SA, Tsai C-J,  
629 Leebens-Mack J** (2019) Shared expression of crassulacean acid metabolism (CAM)  
630 genes pre-dates the origin of CAM in the genus *Yucca*. *J Exp Bot* **70**: 6597–6609
- 631 **Igarashi D, Miwa T, Seki M, Kobayashi M, Kato T, Tabata S, Shinozaki K, Ohsumi C**  
632 (2003) Identification of photorespiratory glutamate:glyoxylate aminotransferase ( GGAT  
633 ) gene in *Arabidopsis*. *Plant J* **33**: 975–987
- 634 **Jin J, Tian F, Yang D-C, Meng Y-Q, Kong L, Luo J, Gao G** (2017) PlantTFDB 4.0: toward  
635 a central hub for transcription factors and regulatory interactions in plants. *Nucleic Acids  
636 Res* **45**: D1040–D1045
- 637 **Jones-Rhoades MW, Bartel DP, Bartel B** (2006) MicroRNAs AND THEIR REGULATORY  
638 ROLES IN PLANTS. *Annu Rev Plant Biol* **57**: 19–53
- 639 **Jones P, Binns D, Chang H-Y, Fraser M, Li W, McAnulla C, McWilliam H, Maslen J,  
640 Mitchell A, Nuka G, et al** (2014) InterProScan 5: genome-scale protein function  
641 classification. *Bioinformatics* **30**: 1236–1240
- 642 **Kong L, Zhang Y, Ye Z-Q, Liu X-Q, Zhao S-Q, Wei L, Gao G** (2007) CPC: assess the  
643 protein-coding potential of transcripts using sequence features and support vector  
644 machine. *Nucleic Acids Res* **35**: W345–W349
- 645 **Kosugi S, Hirakawa H, Tabata S** (2015) GMcloser: closing gaps in assemblies accurately  
646 with a likelihood-based selection of contig or long-read alignments. *Bioinformatics  
647* **btv465**
- 648 **Lee D-K, Kim H Il, Jang G, Chung PJ, Jeong JS, Kim YS, Bang SW, Jung H, Choi Y Do,  
649 Kim J-K** (2015) The NF-YA transcription factor OsNF-YA7 confers drought stress  
650 tolerance of rice in an abscisic acid independent manner. *Plant Sci* **241**: 199–210
- 651 **Li B, Dewey CN** (2011) RSEM: accurate transcript quantification from RNA-Seq data with or  
652 without a reference genome. *BMC Bioinformatics* **12**: 323
- 653 **Li W, Godzik A** (2006) Cd-hit: a fast program for clustering and comparing large sets of  
654 protein or nucleotide sequences. *Bioinformatics* **22**: 1658–1659
- 655 **Liu C, Xu X, Kan J, Cheng Z ming, Chang Y, Lin J, Li H** (2020) Genome-wide analysis of  
656 the C3H zinc finger family reveals its functions in salt stress responses of *Pyrus  
657 betulaefolia*. *PeerJ* **8**: e9328
- 658 **Lowe TM, Eddy SR** (1997) tRNAscan-SE: A Program for Improved Detection of Transfer  
659 RNA Genes in Genomic Sequence. *Nucleic Acids Res* **25**: 955–964
- 660 **Mahesh HB, Subba P, Advani J, Shirke MD, Loganathan RM, Chandana SL, Shilpa S,  
661 Chatterjee O, Pinto SM, Prasad TSK, et al** (2018) Multi-Omics Driven Assembly and  
662 Annotation of the Sandalwood ( *Santalum album* ) Genome. *Plant Physiol* **176**: 2772–  
663 2788
- 664 **Ming R, VanBuren R, Wai CM, Tang H, Schatz MC, Bowers JE, Lyons E, Wang M-L,  
665 Chen J, Biggers E, et al** (2015a) The pineapple genome and the evolution of CAM

- 666 photosynthesis. *Nat Genet* **47**: 1435–1442
- 667 **Ming R, VanBuren R, Wai CM, Tang H, Schatz MC, Bowers JE, Lyons E, Wang ML,**
- 668 **Chen J, Biggers E, et al** (2015b) The pineapple genome and the evolution of CAM
- 669 photosynthesis. *Nat Genet* **47**: 1435–1442
- 670 **Mizoguchi T, Wheatley K, Hanzawa Y, Wright L, Mizoguchi M, Song H-R, Carré IA,**
- 671 **Coupland G** (2002) LHY and CCA1 Are Partially Redundant Genes Required to
- 672 Maintain Circadian Rhythms in Arabidopsis. *Dev Cell* **2**: 629–641
- 673 **Moriya Y, Itoh M, Okuda S, Yoshizawa AC, Kanehisa M** (2007) KAAS: an automatic
- 674 genome annotation and pathway reconstruction server. *Nucleic Acids Res* **35**: W182–
- 675 W185
- 676 **NOBEL PS** (1991) Achievable productivities of certain CAM plants: basis for high values
- 677 compared with C 3 and C 4 plants. *New Phytol* **119**: 183–205
- 678 **Van Noort S, Gardiner AJ, Tolley KA** (2007) New records of *Ficus* (Moraceae) species
- 679 emphasize the conservation significance of inselbergs in Mozambique. *South African J*
- 680 *Bot* **73**: 642–649
- 681 **Pan J, Huang D, Guo Z, Kuang Z, Zhang H, Xie X, Ma Z, Gao S, Lerdau MT, Chu C, et**
- 682 **al** (2018) Overexpression of microRNA408 enhances photosynthesis, growth, and seed
- 683 yield in diverse plants. *J Integr Plant Biol* **60**: 323–340
- 684 **Rawat R, Schwartz J, Jones MA, Sairanen I, Cheng Y, Andersson CR, Zhao Y, Ljung K,**
- 685 **Harmer SL** (2009) REVEILLE1, a Myb-like transcription factor, integrates the circadian
- 686 clock and auxin pathways. *Proc Natl Acad Sci* **106**: 16883–16888
- 687 **Schlüter U, Denton AK, Bräutigam A** (2016) Understanding metabolite transport and
- 688 metabolism in C4 plants through RNA-seq. *Curr Opin Plant Biol* **31**: 83–90
- 689 **Sharkey TD** (1988) Estimating the rate of photorespiration in leaves. *Physiol Plant* **73**: 147–
- 690 152
- 691 **Simão FA, Waterhouse RM, Ioannidis P, Kriventseva E V., Zdobnov EM** (2015) BUSCO:
- 692 assessing genome assembly and annotation completeness with single-copy orthologs.
- 693 *Bioinformatics* **31**: 3210–3212
- 694 **Singh D, Singh B, Goel RK** (2011) Traditional uses, phytochemistry and pharmacology of
- 695 *Ficus religiosa*: A review. *J Ethnopharmacol* **134**: 565–583
- 696 **Smitha RB, Bennans T, Mohankumar C, Benjamin S** (2009) Oxidative stress enzymes in
- 697 *Ficus religiosa* L.: Biochemical, histochemical and anatomical evidences. *J Photochem*
- 698 *Photobiol B Biol* **95**: 17–25
- 699 **Sunkar R, Girke T, Jain PK, Zhu J-K** (2005) Cloning and Characterization of MicroRNAs
- 700 from Rice. *Plant Cell* **17**: 1397–1411
- 701 **Thiel T, Michalek W, Varshney R, Graner A** (2003) Exploiting EST databases for the
- 702 development and characterization of gene-derived SSR-markers in barley (*Hordeum*
- 703 *vulgare* L.). *Theor Appl Genet* **106**: 411–422
- 704 **Usai G, Mascagni F, Giordani T, Vangelisti A, Bosi E, Zuccolo A, Ceccarelli M, King R,**
- 705 **Hassani-Pak K, Zambrano LS, et al** (2020) Epigenetic patterns within the haplotype
- 706 phased fig (*Ficus carica* L.) genome. *Plant J* **102**: 600–614
- 707 **Yang X, Hu R, Yin H, Jenkins J, Shu S, Tang H, Liu D, Weighill DA, Cheol Yim W, Ha**
- 708 **J, et al** (2017) The *Kalanchoë* genome provides insights into convergent evolution and
- 709 building blocks of crassulacean acid metabolism. *Nat Commun* **8**: 1899
- 710 **Yin H, Guo H-B, Weston DJ, Borland AM, Ranjan P, Abraham PE, Jawdy SS, Wachira**
- 711 **J, Tuskan GA, Tschaplinski TJ, et al** (2018) Diel rewiring and positive selection of
- 712 ancient plant proteins enabled evolution of CAM photosynthesis in *Agave*. *BMC*
- 713 *Genomics* **19**: 588
- 714 **Zimin A V., Marçais G, Puiu D, Roberts M, Salzberg SL, Yorke JA** (2013) The MaSuRCA
- 715 genome assembler. *Bioinformatics* **29**: 2669–2677

716

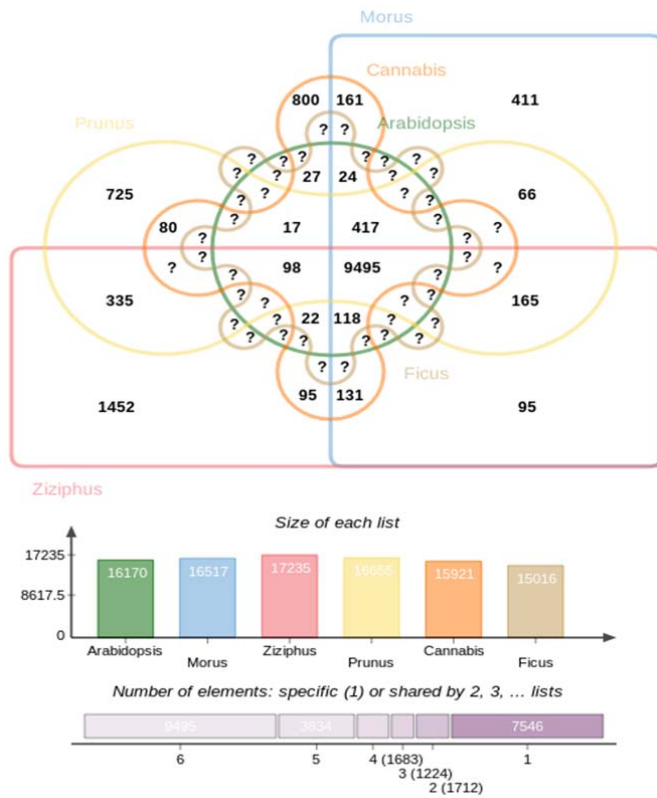

**Figure 3A:** Orthologous clustering of 6 species using proteome data deduced 24310 orthologous gene clusters and 1184 single-copy gene clusters across the above 6 species

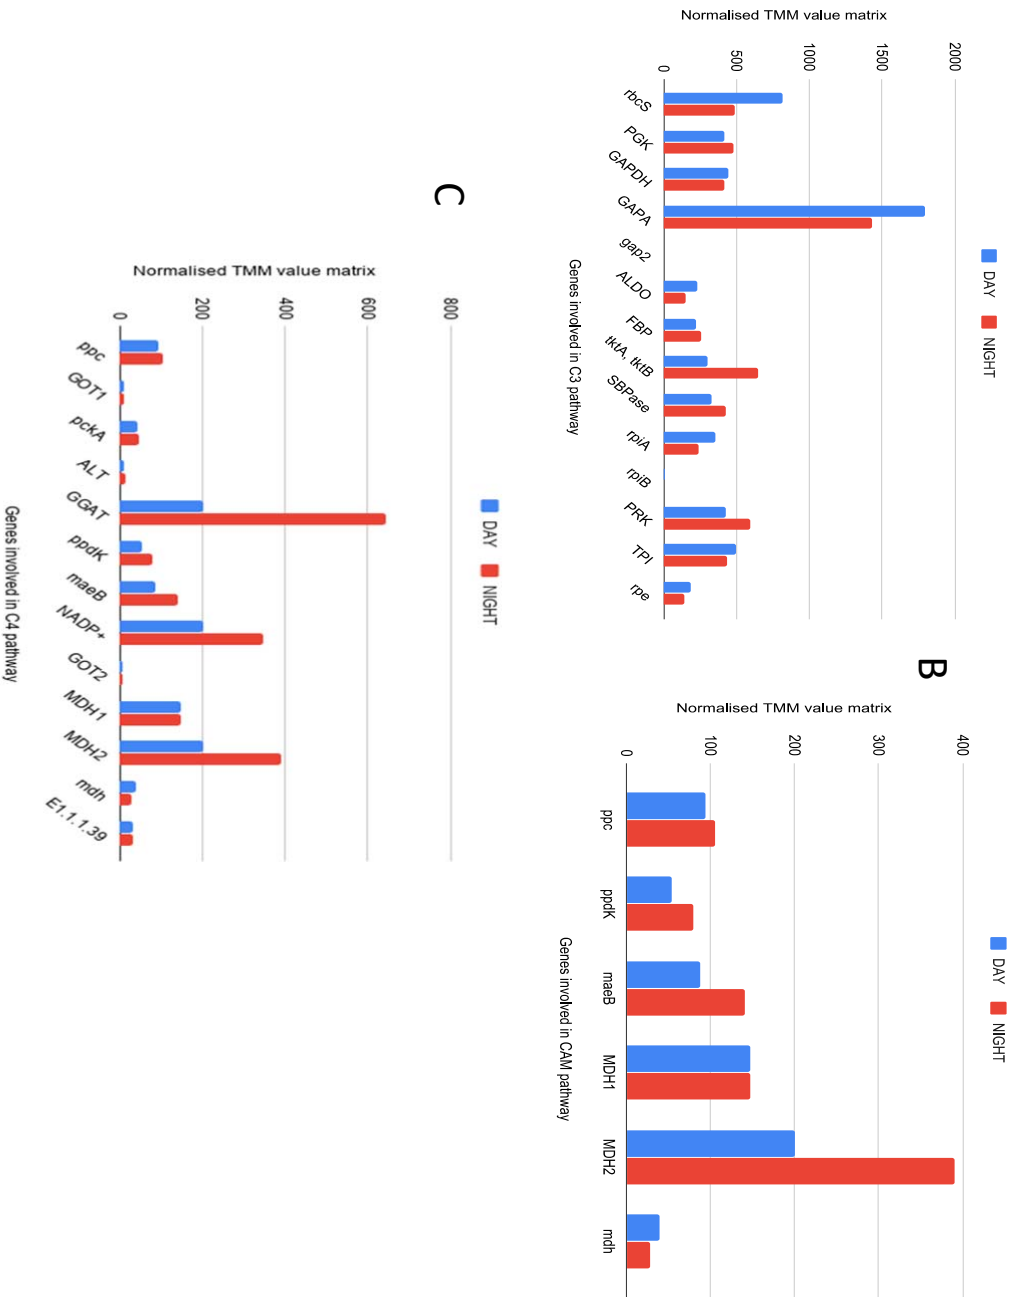

**Figure 6:** The candidate genes involved in the C3, CAM and C4 cycle.

A) Calvin- Benson (C3) cycle B) Crassulacean acid metabolism (CAM) cycle C) C4 cycle. X – axis represents the genes involved pathways, Y – axis is the matrix of normalised expression trimmed mean of M (TMM) values; Blue graph – leaf tissue collected during day period (2 PM), Red graph – leaf tissue collected during night period (2 AM)

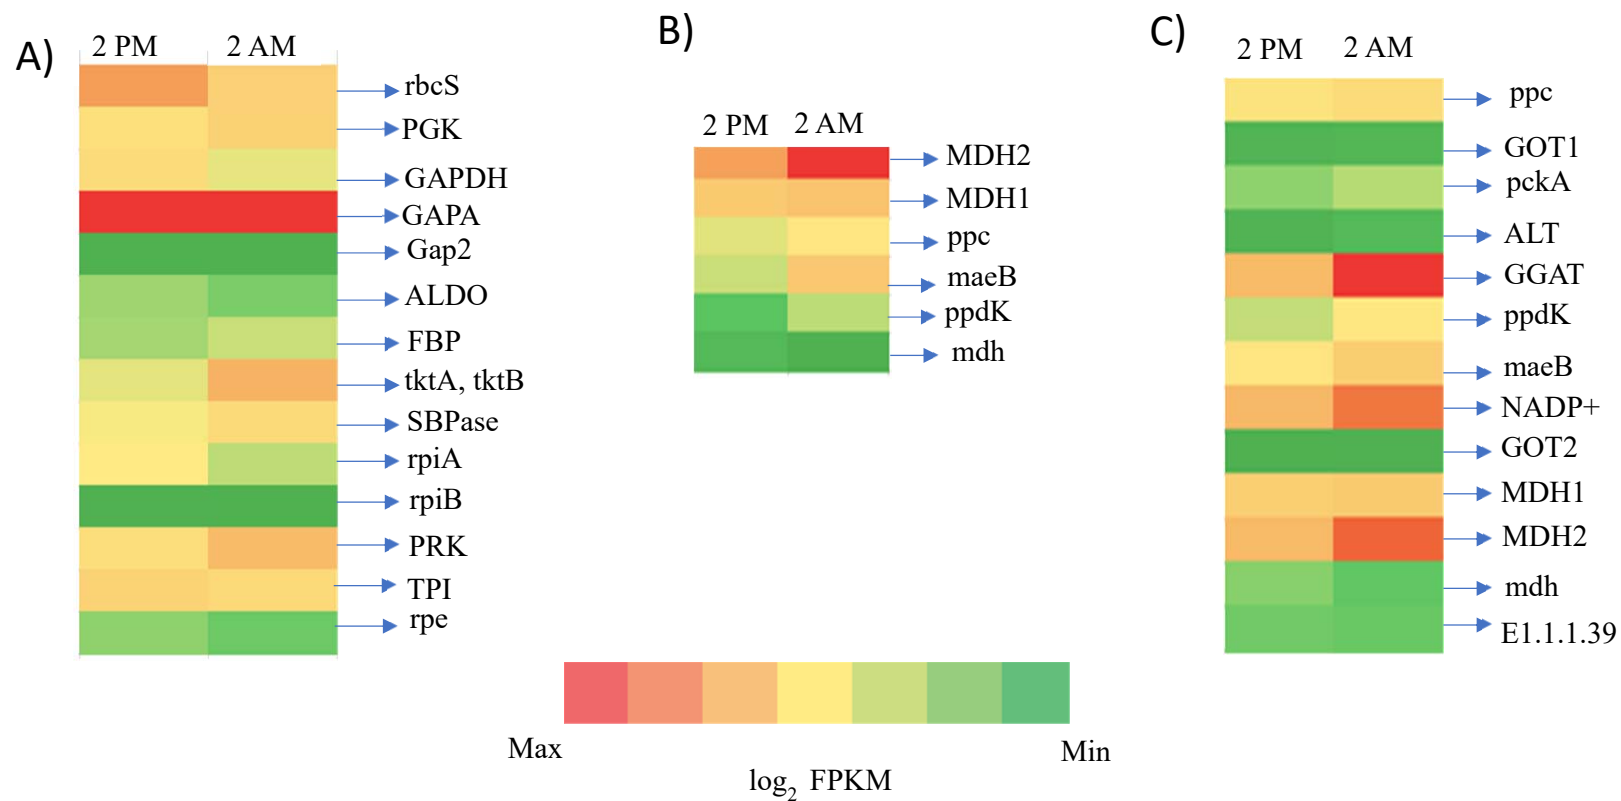

**Figure 7:** Gene expression pattern of *F. religiosa* carbon fixation genes across the diurnal (2 PM) and nocturnal (2 AM) expression data. A) C3 cycle, B) CAM cycle C) C4 cycle  $\log_2$ -transformed Fragments Per Kilobase of transcript per Million mapped reads (FPKM) value based expression profiles are shown



## Parsed Citations

**Bankevich A, Nurk S, Antipov D, Gurevich AA, Dvorkin M, Kulikov AS, Lesin VM, Nikolenko SI, Pham S, Prjibelski AD, et al (2012) SPAdes: A New Genome Assembly Algorithm and Its Applications to Single-Cell Sequencing. J Comput Biol 19: 455–477**

Google Scholar: [Author Only](#) [Title Only](#) [Author and Title](#)

**Bhangale JO, Acharya NS, Acharya SR (2016) Protective effect of Ficus religiosa (L.) against 3-nitropropionic acid induced Huntington disease. Orient Pharm Exp Med 16: 165–174**

Google Scholar: [Author Only](#) [Title Only](#) [Author and Title](#)

**Bhangale JO, Acharya SR (2016) Anti-Parkinson Activity of Petroleum Ether Extract of Ficus religiosa (L.) Leaves. Adv Pharmacol Sci 2016: 1–9**

Google Scholar: [Author Only](#) [Title Only](#) [Author and Title](#)

**Boetzer M, Henkel C V., Jansen HJ, Butler D, Pirovano W (2011) Scaffolding pre-assembled contigs using SSPACE. Bioinformatics 27: 578–579**

Google Scholar: [Author Only](#) [Title Only](#) [Author and Title](#)

**Bolt S, Zuther E, Zintl S, Hincha DK, Schmülling T (2017) ERF105 is a transcription factor gene of Arabidopsis thaliana required for freezing tolerance and cold acclimation. Plant Cell Environ 40: 108–120**

Google Scholar: [Author Only](#) [Title Only](#) [Author and Title](#)

**Campbell MS, Law M, Holt C, Stein JC, Moghe GD, Hufnagel DE, Lei J, Achawanantakun R, Jiao D, Lawrence CJ, et al (2014) MAKER-P: A Tool Kit for the Rapid Creation, Management, and Quality Control of Plant Genome Annotations. Plant Physiol 164: 513–524**

Google Scholar: [Author Only](#) [Title Only](#) [Author and Title](#)

**Chantarasuwan B, Baas P, van Heuven B-J, Baider C, van Welzen PC (2014) Leaf anatomy of Ficus subsection U rostigma (Moraceae). Bot J Linn Soc 175: 259–281**

Google Scholar: [Author Only](#) [Title Only](#) [Author and Title](#)

**Christin P-A, Arakaki M, Osborne CP, Bräutigam A, Sage RF, Hibberd JM, Kelly S, Covshoff S, Wong GK-S, Hancock L, et al (2014) Shared origins of a key enzyme during the evolution of C4 and CAM metabolism. J Exp Bot 65: 3609–3621**

Google Scholar: [Author Only](#) [Title Only](#) [Author and Title](#)

**Conesa A, Gotz S, Garcia-Gomez JM, Terol J, Talon M, Robles M (2005) Blast2GO: a universal tool for annotation, visualization and analysis in functional genomics research. Bioinformatics 21: 3674–3676**

Google Scholar: [Author Only](#) [Title Only](#) [Author and Title](#)

**Guan Q, Tan B, Kelley TM, Tian J, Chen S (2020) Physiological Changes in Mesembryanthemum crystallinum During the C3 to CAM Transition Induced by Salt Stress. Front Plant Sci. doi: 10.3389/fpls.2020.00283**

Google Scholar: [Author Only](#) [Title Only](#) [Author and Title](#)

**Gurevich A, Saveliev V, Vyahhi N, Tesler G (2013) QUAST: quality assessment tool for genome assemblies. Bioinformatics 29: 1072–1075**

Google Scholar: [Author Only](#) [Title Only](#) [Author and Title](#)

**He N, Zhang C, Qi X, Zhao S, Tao Y, Yang G, Lee T-H, Wang X, Cai Q, Li D, et al (2013) Draft genome sequence of the mulberry tree Morus notabilis. Nat Commun 4: 2445**

Google Scholar: [Author Only](#) [Title Only](#) [Author and Title](#)

**Heyduk K, Ray JN, Ayyampalayam S, Moledina N, Borland A, Harding SA, Tsai C-J, Leebens-Mack J (2019) Shared expression of crassulacean acid metabolism (CAM) genes pre-dates the origin of CAM in the genus Yucca. J Exp Bot 70: 6597–6609**

Google Scholar: [Author Only](#) [Title Only](#) [Author and Title](#)

**Igarashi D, Miwa T, Seki M, Kobayashi M, Kato T, Tabata S, Shinozaki K, Ohsumi C (2003) Identification of photorespiratory glutamate:glyoxylate aminotransferase ( GGAT ) gene in Arabidopsis. Plant J 33: 975–987**

Google Scholar: [Author Only](#) [Title Only](#) [Author and Title](#)

**Jin J, Tian F, Yang D-C, Meng Y-Q, Kong L, Luo J, Gao G (2017) PlantTFDB 4.0: toward a central hub for transcription factors and regulatory interactions in plants. Nucleic Acids Res 45: D1040–D1045**

Google Scholar: [Author Only](#) [Title Only](#) [Author and Title](#)

**Jones-Rhoades MW, Bartel DP, Bartel B (2006) MicroRNAs AND THEIR REGULATORY ROLES IN PLANTS. Annu Rev Plant Biol 57: 19–53**

Google Scholar: [Author Only](#) [Title Only](#) [Author and Title](#)

**Jones P, Binns D, Chang H-Y, Fraser M, Li W, McAnulla C, McWilliam H, Maslen J, Mitchell A, Nuka G, et al (2014) InterProScan 5: genome-scale protein function classification. Bioinformatics 30: 1236–1240**

Google Scholar: [Author Only](#) [Title Only](#) [Author and Title](#)

**Kong L, Zhang Y, Ye Z-Q, Liu X-Q, Zhao S-Q, Wei L, Gao G (2007) CPC: assess the protein-coding potential of transcripts using sequence features and support vector machine. *Nucleic Acids Res* 35: W345–W349**

Google Scholar: [Author Only](#) [Title Only](#) [Author and Title](#)

**Kosugi S, Hirakawa H, Tabata S (2015) GMcloser: closing gaps in assemblies accurately with a likelihood-based selection of contig or long-read alignments. *Bioinformatics* 31: 465–473**

Google Scholar: [Author Only](#) [Title Only](#) [Author and Title](#)

**Lee D-K, Kim H II, Jang G, Chung PJ, Jeong JS, Kim YS, Bang SW, Jung H, Choi Y Do, Kim J-K (2015) The NF-YA transcription factor OsNF-YA7 confers drought stress tolerance of rice in an abscisic acid independent manner. *Plant Sci* 241: 199–210**

Google Scholar: [Author Only](#) [Title Only](#) [Author and Title](#)

**Li B, Dewey CN (2011) RSEM: accurate transcript quantification from RNA-Seq data with or without a reference genome. *BMC Bioinformatics* 12: 323**

Google Scholar: [Author Only](#) [Title Only](#) [Author and Title](#)

**Li W, Godzik A (2006) Cd-hit: a fast program for clustering and comparing large sets of protein or nucleotide sequences. *Bioinformatics* 22: 1658–1659**

Google Scholar: [Author Only](#) [Title Only](#) [Author and Title](#)

**Liu C, Xu X, Kan J, Cheng Z ming, Chang Y, Lin J, Li H (2020) Genome-wide analysis of the C3H zinc finger family reveals its functions in salt stress responses of *Pyrus betulaefolia*. *PeerJ* 8: e9328**

Google Scholar: [Author Only](#) [Title Only](#) [Author and Title](#)

**Lowe TM, Eddy SR (1997) tRNAscan-SE: A Program for Improved Detection of Transfer RNA Genes in Genomic Sequence. *Nucleic Acids Res* 25: 955–964**

Google Scholar: [Author Only](#) [Title Only](#) [Author and Title](#)

**Mahesh HB, Subba P, Advani J, Shirke MD, Loganathan RM, Chandana SL, Shilpa S, Chatterjee O, Pinto SM, Prasad TSK, et al (2018) Multi-Omics Driven Assembly and Annotation of the Sandalwood (*Santalum album*) Genome. *Plant Physiol* 176: 2772–2788**

Google Scholar: [Author Only](#) [Title Only](#) [Author and Title](#)

**Ming R, VanBuren R, Wai CM, Tang H, Schatz MC, Bowers JE, Lyons E, Wang M-L, Chen J, Biggers E, et al (2015a) The pineapple genome and the evolution of CAM photosynthesis. *Nat Genet* 47: 1435–1442**

Google Scholar: [Author Only](#) [Title Only](#) [Author and Title](#)

**Ming R, VanBuren R, Wai CM, Tang H, Schatz MC, Bowers JE, Lyons E, Wang ML, Chen J, Biggers E, et al (2015b) The pineapple genome and the evolution of CAM photosynthesis. *Nat Genet* 47: 1435–1442**

Google Scholar: [Author Only](#) [Title Only](#) [Author and Title](#)

**Mizoguchi T, Wheatley K, Hanzawa Y, Wright L, Mizoguchi M, Song H-R, Carré IA, Coupland G (2002) LHY and CCA1 Are Partially Redundant Genes Required to Maintain Circadian Rhythms in Arabidopsis. *Dev Cell* 2: 629–641**

Google Scholar: [Author Only](#) [Title Only](#) [Author and Title](#)

**Moriya Y, Itoh M, Okuda S, Yoshizawa AC, Kanehisa M (2007) KAAS: an automatic genome annotation and pathway reconstruction server. *Nucleic Acids Res* 35: W182–W185**

Google Scholar: [Author Only](#) [Title Only](#) [Author and Title](#)

**NOBEL PS (1991) Achievable productivities of certain CAM plants: basis for high values compared with C 3 and C 4 plants. *New Phytol* 119: 183–205**

Google Scholar: [Author Only](#) [Title Only](#) [Author and Title](#)

**Van Noort S, Gardiner AJ, Tolley KA (2007) New records of *Ficus* (Moraceae) species emphasize the conservation significance of inselbergs in Mozambique. *South African J Bot* 73: 642–649**

Google Scholar: [Author Only](#) [Title Only](#) [Author and Title](#)

**Pan J, Huang D, Guo Z, Kuang Z, Zhang H, Xie X, Ma Z, Gao S, Lerda MT, Chu C, et al (2018) Overexpression of microRNA408 enhances photosynthesis, growth, and seed yield in diverse plants. *J Integr Plant Biol* 60: 323–340**

Google Scholar: [Author Only](#) [Title Only](#) [Author and Title](#)

**Rawat R, Schwartz J, Jones MA, Sairanen I, Cheng Y, Andersson CR, Zhao Y, Ljung K, Harmer SL (2009) REVEILLE1, a Myb-like transcription factor, integrates the circadian clock and auxin pathways. *Proc Natl Acad Sci* 106: 16883–16888**

Google Scholar: [Author Only](#) [Title Only](#) [Author and Title](#)

**Schlüter U, Denton AK, Bräutigam A (2016) Understanding metabolite transport and metabolism in C4 plants through RNA-seq. *Curr Opin Plant Biol* 31: 83–90**

Google Scholar: [Author Only](#) [Title Only](#) [Author and Title](#)

**Sharkey TD (1988) Estimating the rate of photorespiration in leaves. *Physiol Plant* 73: 147–152**

Google Scholar: [Author Only](#) [Title Only](#) [Author and Title](#)

**Simão FA, Waterhouse RM, Ioannidis P, Kriventseva E V., Zdobnov EM (2015) BUSCO: assessing genome assembly and annotation completeness with single-copy orthologs. *Bioinformatics* 31: 3210–3212**

Google Scholar: [Author Only](#) [Title Only](#) [Author and Title](#)

**Singh D, Singh B, Goel RK (2011) Traditional uses, phytochemistry and pharmacology of *Ficus religiosa*: A review. *J Ethnopharmacol* 134: 565–583**

Google Scholar: [Author Only](#) [Title Only](#) [Author and Title](#)

**Smitha RB, Bennans T, Mohankumar C, Benjamin S (2009) Oxidative stress enzymes in *Ficus religiosa* L.: Biochemical, histochemical and anatomical evidences. *J Photochem Photobiol B Biol* 95: 17–25**

Google Scholar: [Author Only](#) [Title Only](#) [Author and Title](#)

**Sunkar R, Girke T, Jain PK, Zhu J-K (2005) Cloning and Characterization of MicroRNAs from Rice. *Plant Cell* 17: 1397–1411**

Google Scholar: [Author Only](#) [Title Only](#) [Author and Title](#)

**Thiel T, Michalek W, Varshney R, Graner A (2003) Exploiting EST databases for the development and characterization of gene-derived SSR-markers in barley (*Hordeum vulgare* L.). *Theor Appl Genet* 106: 411–422**

Google Scholar: [Author Only](#) [Title Only](#) [Author and Title](#)

**Usai G, Mascagni F, Giordani T, Vangelisti A, Bosi E, Zuccolo A, Ceccarelli M, King R, Hassani-Pak K, Zambrano LS, et al (2020) Epigenetic patterns within the haplotype phased fig (*Ficus carica* L.) genome. *Plant J* 102: 600–614**

Google Scholar: [Author Only](#) [Title Only](#) [Author and Title](#)

**Yang X, Hu R, Yin H, Jenkins J, Shu S, Tang H, Liu D, Weighill DA, Cheol Yim W, Ha J, et al (2017) The *Kalanchoë* genome provides insights into convergent evolution and building blocks of crassulacean acid metabolism. *Nat Commun* 8: 1899**

Google Scholar: [Author Only](#) [Title Only](#) [Author and Title](#)

**Yin H, Guo H-B, Weston DJ, Borland AM, Ranjan P, Abraham PE, Jawdy SS, Wachira J, Tuskan GA, Tschaplinski TJ, et al (2018) Diel rewiring and positive selection of ancient plant proteins enabled evolution of CAM photosynthesis in *Agave*. *BMC Genomics* 19: 588**

Google Scholar: [Author Only](#) [Title Only](#) [Author and Title](#)

**Zimin AV., Marçais G, Puiu D, Roberts M, Salzberg SL, Yorke JA (2013) The MaSuRCA genome assembler. *Bioinformatics* 29: 2669–2677**

Google Scholar: [Author Only](#) [Title Only](#) [Author and Title](#)
